# Supplementary material for: The Acute Single and Mixture Toxicity of Paraquat Dichloride and Deltamethrin to Guppy (Poecillia reticulata)
Source: Research Square preprint supplement (doi:10.21203/rs.3.rs-665962/v1), 2021-06-30
Supplement: Supplementary file 1 [file b75d758854c95c777bd72fc0.docx]

**Declarations**

1. **Data availability**

Data are available from the corresponding author upon request.

1. **Animal Research (Ethics)**

Not applicable.

1. **Consent to Participate (Ethics)**

Not applicable.

1. **Concent to Publish (Ethics)**

Not applicable.

1. **Plant Reproducibility**

Not applicable.

1. **Clinical Trials Registration**

Not aplicable.

1. **Author Contribution**

Rully Adi Nugroho contributed to the study conception and design. Material preparation and data collection were performed by Rully Adi Nugroho. Data analysis was performed by Rully Adi Nugroho and Cornelis AM van Gestel. The first draft of the manuscript was written by Rully Adi Nugroho and all authors commented on previous versions of the manuscript. All authors read and approved the final manuscript.

1. **Conflict of Interest**

We have no conflicts of interest to disclose.
